# Supplementary material for: Establishing clinical severity for PROMIS® measures in adult patients with rheumatic diseases
Source: Springer Nature journal article supplement (doi:10.1007/s11136-017-1709-z), 2017-10-05
Supplement: MOESM1 [file 15112664]

**Title**

Establishing Clinical Severity for PROMIS® Measures in Adult Patients with Rheumatic Diseases

**Authors**

Vivek Nagaraja, MD1,2; Constance Mara, PhD3; Puja P. Khanna MD, MPH1,4; Rajaie Namas MD1; Amber Young MD1,2; David A Fox MD1; Timothy Laing MD1; William J. McCune MD1; Carol Dodge OTRL, CHT1; Debra Rizzo1; Maha Almackenzie MD5; Dinesh Khanna, MD, MS1,2

**Institutional affiliations**:

1 Division of Rheumatology, University of Michigan, Ann Arbor, MI

2 University of Michigan Scleroderma Program, University of Michigan, Ann Arbor, MI

3 Behavioral Medicine and Clinical Psychology, Cincinnati Children's Hospital Medical Center, Cincinnati, OH

4 Ann Arbor Veterans Affairs Medical Center Ann Arbor, MI

5 Department of Medicine, University of Toledo, Toledo, OH

**Corresponding Author**:

Dinesh Khanna, MD MS

Division of Rheumatology, University of Michigan

300 North Ingalls Building, Room 7C27, Ann Arbor, MI  48109-5422

Phone 734-936-5561 / Fax 734-763-1253

Email: [khannad@med.umich.edu](mailto:khannad@med.umich.edu)

**Supplementary material: Case vignettes**

1. PHYSICAL FUNCTION CASE VIGNETTES

Vignette 1

Mrs. Pratt is a 45-year-old woman with rheumatoid arthritis. In the past 7-days–

- Her health did not limit her from lifting and carrying groceries
- She was able to do chores such as vacuuming or yard work without any difficulty
- She was able to cut her food using eating utensils without any difficulty
- She was able to carry a laundry basket up a flight of stairs without any difficulty
- Her health did not limit her in doing strenuous activities such as backpacking, skiing, playing tennis, bicycling or jogging

Vignette 2

Ms. Chamberlin is a 40-year-old woman with lupus. In the past 7-days–

- She was able to step up and down curbs without any difficulty
- She was able to open previously opened jars without any difficulty
- She was able to carry a laundry basket up a flight of stairs without any difficulty
- She was able to put on a shirt or blouse without any difficulty
- She was able to turn a key in a lock with a little difficulty

Vignette 3

Mr. Baker is a 75-year-old man with osteoarthritis. In the past 7-days,

- His health did not limit him in bathing or dressing himself
- He was able to exercise for an hour without any difficulty
- He was able to open a can with a hand can opener without any difficulty
- His health limited him a little in bending, kneeling, and stooping
- He was able to put on and take off a coat or jacket with a little difficulty

Vignette 4

Ms. Brown is a 65-year-old woman with rheumatoid arthritis. In the past 7-days,

- She was able to go up and down stairs at a normal pace without any difficulty
- She was able to open previously opened jars with a little difficulty
- She was able to open and close a zipper with a little difficulty
- She was able to put on and take off a coat or jacket with a little difficulty
- She was able to turn a key in a lock with some difficulty

Vignette 5

Mr. Miller is a 40-year-old man with psoriatic arthritis. In the past 7-days,

- He was able to use a hammer to pound a nail with a little difficulty
- He was able to stand for short periods of time with a little difficulty
- He was able to run at a fast pace for two miles with a little difficulty
- He was able to open a new milk carton with some difficulty
- His health somewhat limited him in getting in and out of the bathtub

Vignette 6:

Mrs. Wilson is a 50-year-old woman with myositis. In the past 1-week,

- She was able to kneel on the floor with a little difficulty
- She was able to use her hands, such as for turning faucets, using kitchen gadgets, or sewing with some difficulty
- She was able to turn from side to side in bed with some difficulty
- She was able to climb up 5 flights of stairs with some difficulty
- She had much difficulty wiping herself after using the toilet

Vignette 7:

Ms. Taylor is a 55-year-old woman with lupus. In the past 7-days,

- She was able to transfer from a bed to a chair and back with some difficulty
- She was able to kneel on the floor with some difficulty
- She was able to walk a block on flat ground with some difficulty
- She was able to reach into a low cupboard with much difficulty
- Her health limited her quite a lot, in participating in active sports such as swimming, tennis, or basketball

Vignette 8:

Mr. Martin is a 58-year-old man with recurrent gout. In the past 7-days,

- His health somewhat limited him in climbing several flights of stairs
- He was able to run five miles with much difficulty
- He was able to bend or twist his back with much difficulty
- He was able to put on a shirt with much difficulty
- He was able to lift 10 pounds above his shoulder with much difficulty

Vignette 9:

Mr. Lee is a 48-year-old man with recurrent gout. In the past 7-days,

- His health limited him quite a lot, in doing heavy work around the house like scrubbing floors, or lifting or moving heavy furniture
- He was able to stand up from an armless straight chair with much difficulty
- He was able to stand for one hour with much difficulty
- He was unable to exercise hard for half an hour
- He was unable to pull heavy objects (10 pounds) towards himself

Vignette 10:

Mrs. Torres is a 52-year-old woman with Rheumatoid arthritis. In the past 7-days,

- She was able to exercise hard for half an hour with much difficulty
- She was able to step up and down curbs with much difficulty
- She was unable to dry her back with a towel
- She was unable to move a chair from one room to another
- She was unable to turn a key in a lock

Vignette 11:

Ms. Cook is a 58-year-old woman with Rheumatoid arthritis. In the past 7-days,

- She was able to squat and get up with much difficulty
- She was unable to run or jog for two miles
- She was unable to pull on trousers
- She was unable to peel fruit
- She was unable to get in and out of a car

Vignette 12:

Ms. Collins is a 38-year-old woman with Rheumatoid arthritis. In the past 7-days,

- She was unable to get in and out of the bathtub
- She was unable to climb up 5 flights of stairs
- She was unable to run five miles
- She was unable to lift a full cup or glass to her mouth
- She was unable to trim her fingernails

1. PAIN INTERFERNCE VIGNETTES

Vignette 1

Mrs. Smith is a 35-year-old woman with rheumatoid arthritis. In the past 7-days, her joint pain –

- Did not interfere with her enjoyment of life
- Did not interfere with her ability to concentrate
- Did not make her feel depressed
- Did not interfere with her household chores
- Did not prevent her from walking more than 1-mile

Vignette 2

Ms. Payne is a 40-year-old woman with lupus. In the past 7-days, her overall pain –

- Interfered a little bit with her day to day activities
- Did not interfere with her relationships with other people
- Felt like it was a little bit of a burden to her
- Did not restrict her social life to her home
- Did not prevent her from standing for more than 30 minutes

Vignette 3:

Mr. Stone is a 75-year-old man with osteoarthritis. In the past 7-days, his joint pain –

- Has somewhat been distressing him often
- Has not been severe enough that he could think of nothing else
- Makes him feel a little bit anxious
- Makes him avoid social activities a little bit, because it may make him hurt more
- Did not interfere with his ability to remember things

Vignette 4:

Ms. Lopez is a 65-year-old woman with rheumatoid arthritis. In the past 7-days, her joint pain –

- Interfered a little bit with her ability to remember things
- Did not keep her from getting into a standing position
- Somewhat made her feel emotionally tense
- Felt like quite a bit of burden to her
- Somewhat interfered with work around the home

Vignette 5:

Mr. Smith is a 40-year-old man with psoriatic arthritis. In the past 7-days, his joint pain –

- Somewhat made it difficult for him to take in new information
- Interfered quite a bit with his ability to participate in leisure activities
- Somewhat made him feel depressed
- Made it quite a bit difficult for him to fall asleep
- Very much prevented him from walking more than 1-mile

Vignette 6:

Mrs. Vanderbilt is a 50-year-old woman with myositis. In the past 1-week, her muscle pain –

- Somewhat prevented her from sitting for more than 10-minutes
- Restricted quite a bit of her social life to her home
- Made her feel anxious quite a bit
- Very much interfered with doing her tasks away from home [eg: getting groceries]
- Very much interfered in her ability to do household chores

Vignette 7:

Ms. Espinoza is a 55-year-old woman with lupus. In the past 7-days, her chest pain –

- Was quite severe that she could think of nothing else
- Quite often prevented her from sitting for more than 10-minutes
- Made it very difficult to fall asleep
- Very often made her avoid social activities because it might make her hurt more
- Very often was distressing to her

Vignette 8:

Mr. Romano is a 58-year-old man with recurrent gout. In the past 7-days, his joint pain due to gout –

- Interfered very much with his day-to-day activities
- Interfered very much with his ability to work [including work at home]
- Was very distressing to him
- Made it very difficult to fall asleep
- Very often kept him from socializing with others

1. SLEEP DISTURBANCE VIGNETTES

Vignette 1

Mrs. Reed is a 45-year-old woman with rheumatoid arthritis. In the past 7-days,

- She always got enough sleep
- She was very much satisfied with her sleep
- Her sleep was very much refreshing
- She did not feel lousy when she woke up
- She did not have a problem with her sleep

Vignette 2

Ms. Peterson is a 40-year-old woman with lupus. In the past 7-days,

• She did not feel sad at bedtime

• She did not have trouble getting into a comfortable position to sleep

• She did not try hard to get to sleep

• A little bit of stress disturbed her sleep

• She tossed and turned, a little bit, at night

Vignette 3

Mr. Baker is a 75-year-old man with osteoarthritis. In the past 7-days,

- He never had trouble staying asleep
- He never had trouble sleeping
- He woke up and had a little bit of trouble falling back to sleep
- He was a little bit afraid he would not get back to sleep after waking up
- He felt a little bit worried at bedtime

Vignette 4

Ms. Brown is a 65-year-old woman with rheumatoid arthritis. In the past 7-days,

- She has been a little bit satisfied with her sleep
- Her sleep was a little bit refreshing
- She felt a little bit lousy when she woke up
- She had a little bit of problem with her sleep
- She sometimes got enough sleep

Vignette 5

Ms. Miller is a 40-year-old woman with psoriatic arthritis. In the past 7-days,

- She had a little bit of problem with her sleep
- It was often easy for her to fall asleep
- She somewhat had difficulty falling asleep
- She sometimes layed in bed for hours waiting to fall asleep
- She sometimes woke up too early and could not fall back asleep.

Vignette 6:

Mrs. Wilson is a 50-year-old woman with myositis. In the past 1-week,

- She somewhat worried about not being able to fall asleep
- She somewhat felt worried at bedtime
- She somewhat had trouble stopping her thoughts at bedtime
- She somewhat felt sad at bedtime
- She somewhat had trouble getting into a comfortable position to sleep

Vignette 7:

Ms. Taylor is a 55-year-old woman with lupus. In the past 7-days,

- She sometimes got enough sleep
- She was somewhat satisfied with her sleep
- She somewhat thinks her sleep was refreshing
- She very much felt lousy when she woke up
- She very much had a problem with her sleep

Vignette 8:

Mr. Martin is a 58-year-old man with recurrent gout. In the past 7-days,

- It was sometimes not easy for him to fall asleep
- He somewhat had difficulty falling asleep
- He always laid in bed for hours waiting to fall asleep
- He always woke up too early and could not fall back asleep
- He very much felt physically tense at bedtime

Vignette 9:

Mr. Lee is a 48-year-old man with recurrent gout. In the past 7-days,

- He somewhat tried hard to get to sleep
- Stress disturbed his sleep very much
- He very much tossed and turned at night
- He always had trouble staying asleep
- He always woke up and had trouble falling back to sleep

Vignette 10:

Mrs. Torres is a 52-year-old woman with rheumatoid arthritis. In the past 7-days,

- She very much felt physically tense at bedtime
- She very much worried about not being able to fall asleep
- She very much felt worried at bedtime
- She very much had trouble stopping her thoughts at bedtime
- She very much felt sad at bedtime

1. DEPRESSION CASE VIGNETTES

Vignette 1

Mrs. Sanders is a 40-year-old woman with rheumatoid arthritis. In the past 7-days, due to her arthritis –

- Never felt worthless
- Never felt depressed
- Never had trouble making decisions
- Never felt ignored by other people
- Never felt emotionally exhausted

Vignette 2

Ms. Pringle is a 35-year-old woman with lupus. In the past 7-days, due to her overall pain she –

- Never felt feel helpless
- Rarely felt sad
- Rarely felt disappointed in herself
- Never felt upset for no reason
- Never felt guilty

Vignette 3:

Mr. Stinger is a 75-year-old man with osteoarthritis. In the past 7-days, due to his joint pain he –

- Rarely had trouble feeling close to people
- Rarely felt disappointed in himself
- Never felt that he was not needed
- Rarely felt depressed
- Never felt that his life was empty

Vignette 4:

Ms. Lopez is a 65-year-old woman with rheumatoid arthritis. In the past 7-days, due to her joint pain she –

- Felt a little worthless
- Felt a little that nothing could cheer her up
- Somewhat withdrew from other people
- Felt a little that she wanted to give up on everything
- Did not feel that she had no reason for living

Vignette 5:

Mr. Hartnup is a 40-year-old man with psoriatic arthritis. In the past 7-days, due to his joint pain he –

- Somewhat felt that he was not needed
- Somewhat felt lonely
- Felt a little that he had no reason for living
- Somewhat felt ignored by people
- Somewhat felt that his life was empty

Vignette 6:

Mrs. Johnson is a 50-year-old woman with myositis. In the past 1-week, due to her muscle weakness she–

- Somewhat felt that nothing could cheer her up
- Somewhat felt hopeless
- Felt quite discouraged about the future
- Found that things in her life were quite overwhelming
- Felt quite emotionally exhausted

Vignette 7:

Ms. Jimenez is a 55-year-old woman with lupus. In the past 7-days, due to her chest pain she –

- Felt quite helpless
- Quite often felt that she was not as good as other people
- Felt very discouraged about the future
- Quite often felt that nothing was interesting
- Quite often felt that she had no reason for living

Vignette 8:

Mr. Romano is a 58-year-old man with recurrent gout. In the past 7-days, due his joint pain he –

- Felt very helpless
- Very much withdrew from other people
- Quite often had trouble making decisions
- Felt very pessimistic
- Very much found that things in his life were overwhelming

Vignette 9:

Mr. Clarke is a 76-year-old man with history of polymyalgia rheumatica. In the past 7-days, due to worsening shoulder and hip pain, he –

- Felt very helpless
- Very much felt that nothing could cheer him up
- Very much felt like a failure
- Felt very disappointed with himself
- Had very much trouble making decisions
